# Supplementary material
Source: publisher figshare collection journal article supplement (https://f1000.figshare.com/ndownloader/files/1134496)
Supplement: Supplementary file 1 [file 1134496]

Replicate	BDP M1	BDP IS	BDP EI M1	BDP EI IS	1-ABT BDP M1	1-ABT BDP IS	1-ABT EI M1 M1	1-ABT EI M1 IS	BDP M5	BDP IS	BDP EI M5	BDP EI IS	1-ABT BDP M5	1-ABT BDP IS	1-ABT EI M1 M5	1--ABT EI M1 IS
1	3196009	2132941237	712990	44774220560	773513	3742115072	768893641	5889750478	3921422	2419853447	10486730	4479849266	6605543	5114665912	nd	na
2	2966019	2242156377	748432	4860922695	74261	3450547246	686417744	6068742339	5774025	2779214176	10011527	4485825130	3470597	4391903243	nd	na
3	8501977	2746574277	86761	3392058726	1197728	3644572821	762320792	6018957506	11250228	3451124887	7650711	3131469070	2396460	4451652655	n.d.	na
